# Supplementary material for: Impact of Magnetite Nanowires on In Vitro Hippocampal Neural Networks
Source: MDPI journal article supplement (doi:10.3390/biom13050783), 2023-04-30
Supplement: s1 [file s1]

Supplementary Materials

# Impact of Magnetite Nanowires on In Vitro Hippocampal Neural Networks

Belén Cortés-Llanos <sup>1,2,3,\*</sup>, Rossana Rauti <sup>4,5</sup>, Ángel Ayuso-Sacido <sup>6,7</sup>, Lucas Pérez <sup>1,2</sup> and Laura Ballerini <sup>4,\*</sup>

<sup>1</sup> Departamento de Física de Materiales, Universidad Complutense de Madrid, 28040 Madrid, Spain

<sup>2</sup> Fundación IMDEA Nanociencia, C/Faraday 9, 28049 Madrid, Spain

<sup>3</sup> Department of Medicine, Duke University, Durham, NC 27705, USA

<sup>4</sup> International School for Advanced Studies (ISAS-SISSA), 34136 Trieste, Italy

<sup>5</sup> Department of Biomolecular Sciences, Università degli Studi di Urbino Carlo Bo, 61029 Urbino, Italy; rossana.rauti@uniurb.it

<sup>6</sup> Brain Tumor Laboratory, Fundación Vithas, Grupo Hospitales Vithas, 28043 Madrid, Spain; ayusoa@vithas.es

<sup>7</sup> Faculty of Experimental Science and Faculty of Medicine, University of Francisco de Vitoria, 28223 Madrid, Spain

\* Correspondence: belencortesllanos@gmail.com (B.C.-L.); ballerin@sissa.it (L.B.)

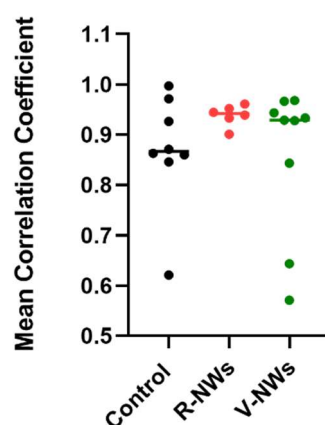

**Figure S1.** Synchronization analysis. Mean correlation coefficient of calcium transients in cultured neurons in a control (n=8 samples), R-NWs (n=5 samples), and V-NWs (n=6 samples) substrate.

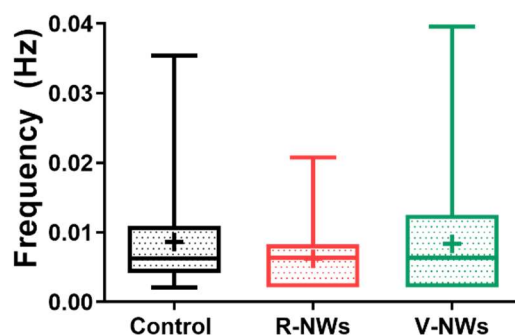

**Figure S2.** Box plot frequency for TTX in control (n=172 cells, 7 samples), R-NWs (118 cells, 4 samples) and V-NWs substrates (n = 73, 4 samples).
